# Supplementary material for: Highly Efficient Antimicrobial Activity of CuxFeyOz Nanoparticles against Important Human Pathogens
Source: MDPI journal article supplement (doi:10.3390/nano10112294), 2020-11-20
Supplement: s1 [file s1]

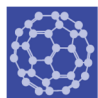

Supporting Information

# Highly Efficient Antimicrobial Activity of $Cu_xFe_yO_z$ Nanoparticles Against Important Human Pathogens

Lu Zhu <sup>1</sup>, David W. Pearson <sup>2</sup>, Stéphane L. Benoit <sup>3</sup>, Jing Xie <sup>4</sup>, Jitendra Pant <sup>1</sup>, Yanjun Yang <sup>1</sup>, Arnab Mondal <sup>1</sup>, Hitesh Handa <sup>1</sup>, Jane Y. Howe <sup>5</sup>, Yen-Con Hung <sup>4</sup>, Jorge E. Vidal <sup>6</sup>, Robert J. Maier <sup>3</sup>, and Yiping Zhao <sup>2,\*</sup>

<sup>1</sup> School of Chemical, Materials and Biomedical Engineering, College of Engineering, University of Georgia, Athens, GA 30602, USA; zhulu5466@gmail.com (L.Z.); jp50261@uga.edu (J.P.); YanjunYang@uga.edu (Y.Y.); Arnab.Mondal@uga.edu (A.M.); hhanda@uga.edu (H.H.)

<sup>2</sup> Department of Physics and Astronomy, University of Georgia, Athens, GA 30602, USA; davidwpuga@gmail.com

<sup>3</sup> Department of Microbiology, University of Georgia, Athens, GA 30602, USA; stefbens@uga.edu (S.L.B.); rmaier@uga.edu (R.J.M.)

<sup>4</sup> Department of Food Science & Technology, University of Georgia, Griffin, GA 30223, USA; jing.xie25@uga.edu (J.X.); yhung@uga.edu (Y.-C.H.)

<sup>5</sup> Department of Materials Science & Engineering, University of Toronto, Toronto, ON M5S 1A1, Canada; jane.howe@utoronto.ca

<sup>6</sup> Department of Microbiology and Immunology, University of Mississippi, Jackson, MS 39216, USA; jvidal@umc.edu

\* Correspondence: zhaoy@uga.edu

## S1. Summary of different bacteria strains used in this work

Table S1. Bacterial strains used in this study

| Strain                                 | Relevant characteristics                                 | Source or Reference |
|----------------------------------------|----------------------------------------------------------|---------------------|
| <i>Gram-negative</i>                   |                                                          |                     |
| <i>Escherichia coli</i>                |                                                          |                     |
| strain B                               | Nonpathogenic                                            | ATCC (11303)        |
| strain O157:H7 E009                    | Nalidixic acid resistant                                 | Ref. [1]            |
| <i>Helicobacter pylori</i>             |                                                          |                     |
| strain X47                             | Mouse-colonizing strain                                  | Ref. [2]            |
| <i>Klebsiella pneumoniae</i>           |                                                          |                     |
| strain 4/484                           | Nosocomial, Multidrug-Resistant                          | Ref. [3]            |
| strain 1100975                         | Multidrug resistant (New Delhi metallo-beta-lactamase 1) | ATCC (BAA2472)      |
| <i>Salmonella enterica</i> Typhimurium |                                                          |                     |
| strain 700408                          | Multidrug resistant                                      | ATCC (700408)       |
| <i>Shigella flexneri</i>               |                                                          |                     |
| strain 2457T                           | Serotype 2a                                              | ATCC (700930)       |
| <i>Gram-positive</i>                   |                                                          |                     |
| <i>Listeria monocytogenes</i>          |                                                          |                     |
| strain Scott A                         | Human isolated from an outbreak linked to milk           | Ref. [4]            |
| <i>Staphylococcus aureus</i>           |                                                          |                     |
| Strain Rosenbach                       | Pathogenic                                               | ATCC (6538)         |

ATCC: American Type Culture Collectio

## S2. Size characterization of different $\text{Cu}_x\text{Fe}_y\text{O}_z$ NP samples

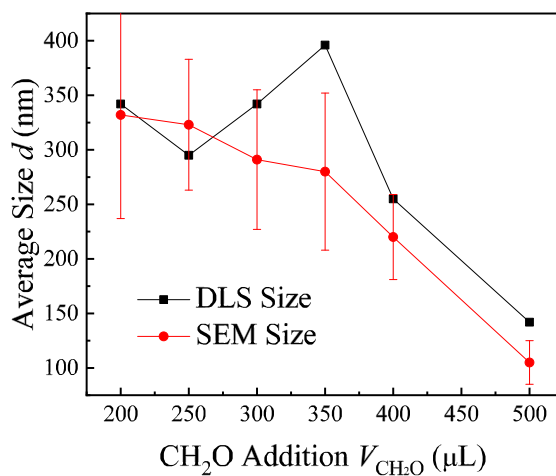

**Figure S1.** Size comparison between SEM data and dynamic light scattering (DLS). Different  $\text{Cu}_x\text{Fe}_y\text{O}_z$  NP samples are designated by formaldehyde ( $\mu\text{L}$ ) addition during synthesis.

**Table S2** Summary of the properties of  $\text{Cu}_x\text{Fe}_y\text{O}_z$  NP samples

| Sample of $\text{Cu}_x\text{Fe}_y\text{O}_z$ as (L) of Formaldehyde | XRD Crystallite Size (nm) | SEM Average Size (nm) | Zeta Potential (mV) | 10 hour MO Concentration <u>Reduction</u> (Dark) | 24 hour MO Concentration <u>Reduction</u> (Dark) |
|---------------------------------------------------------------------|---------------------------|-----------------------|---------------------|--------------------------------------------------|--------------------------------------------------|
| 200                                                                 | 35.3                      | 300                   | 20.9                | 3%                                               | 22%                                              |
| 250                                                                 | 35.3                      | 270                   | -13.3               | 38%                                              | 71%                                              |
| 300                                                                 | 42.4                      | 220                   | -8.7                | 35%                                              | 76%                                              |
| 350                                                                 | 21.2                      | 220                   | 13.8                | 35%                                              | 85%                                              |
| 400                                                                 | 23.6                      | 230                   | 14                  | 28%                                              | 61%                                              |
| 500                                                                 | 53                        | 130                   | -10.5               | 83%                                              | 90%                                              |

## S3. Catalytic activity of S500 against MO and MG

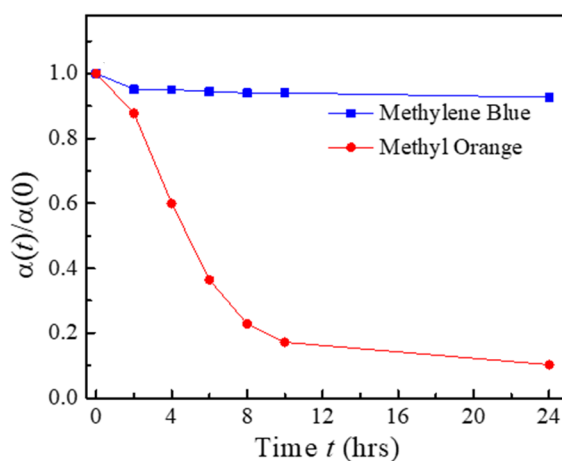

**Figure S2.** The normalized and time dependent optical absorption  $\alpha(t)/\alpha(0)$  of the characteristic peaks of MO and MB after mixed with S500. The experiments were performed under dark.

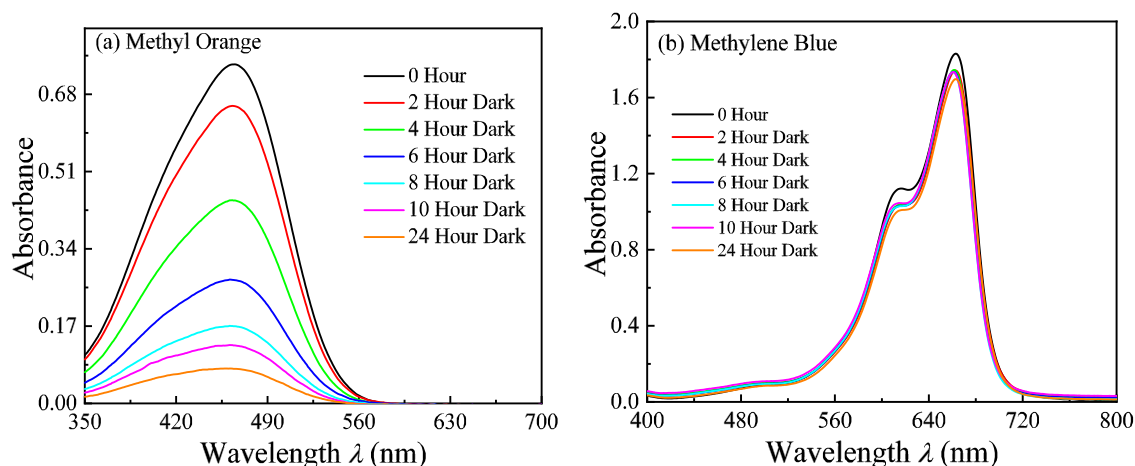

**Figure S3.** The time dependent UV-Vis spectra of (a) methyl orange and (b) methylene blue after mixed with S500  $\text{Cu}_x\text{Fe}_y\text{O}_z$  NPs in dark for 24 hours.

#### S4. Antimicrobial tests for different concentrations of S200 and S500

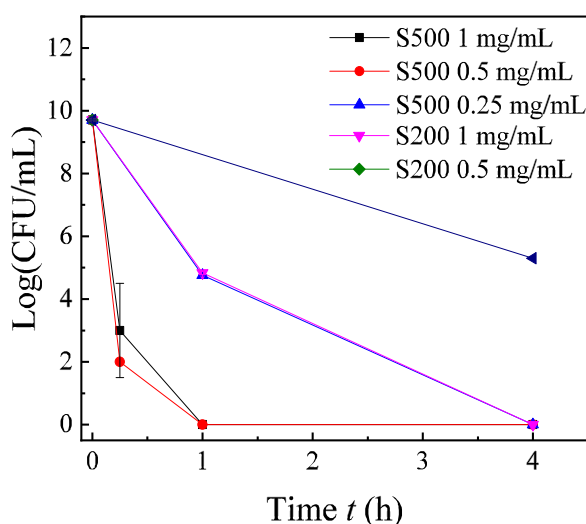

**Figure S4.** Concentration-dependent antimicrobial activity of S200 and S500 samples against *E. coli* B.

#### S5. Control samples and their properties

The control  $\text{Fe}_2\text{O}_3$  and  $\text{Cu}_2\text{O}$  NPs were synthesized under the same microwave assisted hydrothermal condition with 500  $\mu\text{L}$  37% formaldehyde (Unfortunately we could not obtain  $\text{CuFeO}_2$  NPs under similar conditions or other conditions). We kept the ion molar amount the same for the synthesis, i.e., for  $\text{Fe}_2\text{O}_3$  NPs, 1 mmol  $\text{Fe}(\text{NO}_3)_3 \cdot 9\text{H}_2\text{O}$  (0.404 g) was used; while for  $\text{Cu}_2\text{O}$  NPs, 1 mmol  $\text{Cu}(\text{NO}_3)_2 \cdot 3\text{H}_2\text{O}$  (0.242 g) was used. The average sizes of the  $\text{Fe}_2\text{O}_3$  and  $\text{Cu}_2\text{O}$  NPs were determined to be 632 and 832 nm by a dynamic light scattering measurements. The composition of the resulted NPs was determined by XRD, as shown in Fig. S5. The control  $\text{Fe}_2\text{O}_3$  NPs are confirmed as pure  $\text{Fe}_2\text{O}_3$  while the  $\text{Cu}_2\text{O}$  NPs contain small amount of  $\text{CuO}$ .

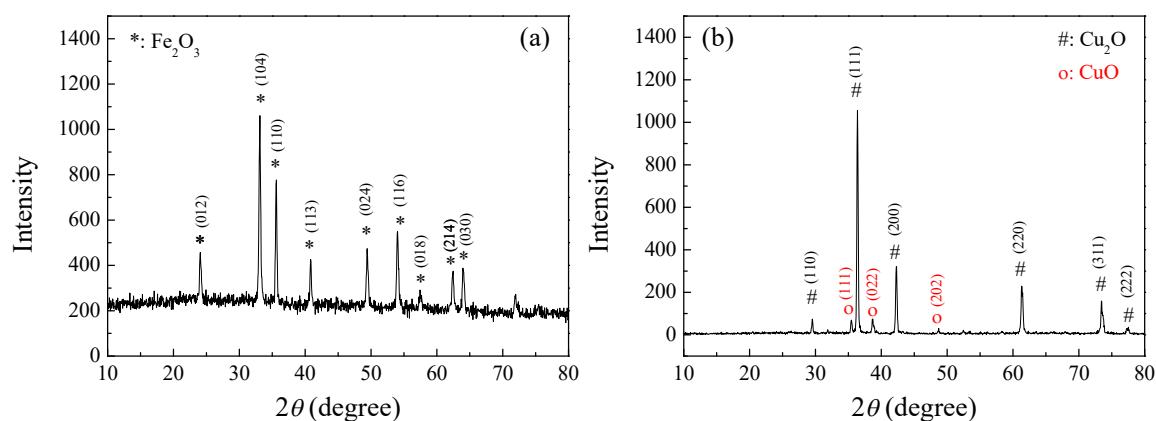

Figure S5. XRD patterns of the control (a)  $\text{Fe}_2\text{O}_3$  and (b)  $\text{Cu}_2\text{O}$  NPs.

## References

1. Yemmireddy, V.K.; Hung, Y.-C. Selection of photocatalytic bactericidal titanium dioxide ( $\text{TiO}_2$ ) nanoparticles for food safety applications. *LWT - Food Science and Technology* **2015**, *61*, 1-6, doi:10.1016/j.lwt.2014.11.043.
2. Veyrier, F.J.; Ecobichon, C.; Boneca, I.G. Draft Genome Sequence of Strain X47-2AL, a Feline *Helicobacter pylori* Isolate. *Genome announcements* **2013**, *1*, doi:10.1128/genomeA.01095-13.
3. Ostría-Hernández, M.L.; Juárez-de la Rosa, K.C.; Arzate-Barbosa, P.; Lara-Hernández, A.; Sakai, F.; Ibarra, J.A.; Castro-Escarpulli, G.; Vidal, J.E. Nosocomial, Multidrug-Resistant *Klebsiella pneumoniae* Strains Isolated from Mexico City Produce Robust Biofilms on Abiotic Surfaces but Not on Human Lung Cells. *Microbial Drug Resistance* **2018**, *24*, 422-433.
4. Kim, C.; Hung, Y.-C.; Brackett, R.E. Efficacy of electrolyzed oxidizing (EO) and chemically modified water on different types of foodborne pathogens. *International Journal of Food Microbiology* **2000**, *61*, 199-207.

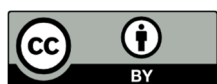

© 2020 by the authors. Licensee MDPI, Basel, Switzerland. This article is an open access article distributed under the terms and conditions of the Creative Commons Attribution (CC BY) license (<http://creativecommons.org/licenses/by/4.0/>).
